# Supplementary material
Source: PubMed Central journal article supplement (PMC6858872)
Supplement: EMS84528-supplement-Supplementary_tables.pdf [file EMS84528-supplement-Supplementary_tables.pdf]

### Supplementary Table 1

Figure 1g - BiP ATPase activity with effector proteins (pmol/ $\mu$ l/min)

|                     |       |
|---------------------|-------|
| BiP                 | 0.082 |
| BiP+IRE1            | 0.086 |
| BiP+PERK            | 0.087 |
| BiP+Sil1            | 0.107 |
| BiP+Sil1+IRE1       | 0.080 |
| BiP+Sil1+PERK       | 0.081 |
| BiP+ERdj3           | 0.221 |
| BiP+ERdj3+IRE1      | 0.091 |
| BiP+ERdj3+PERK      | 0.084 |
| BiP+ERdj3+Sil1      | 0.386 |
| BiP+ERdj3+Sil1+IRE1 | 0.081 |
| BiP+ERdj3+Sil1+PERK | 0.086 |

### Supplementary Table 2

Figure 2b - BiP ATPase activity with effector proteins and CH1 (pmol/ $\mu$ l/min)

|                          |       |
|--------------------------|-------|
| BiP                      | 0.082 |
| BiP+CH1                  | 0.126 |
| BiP+Sil1                 | 0.107 |
| BiP+Sil1+ CH1            | 0.161 |
| BiP+ERdj3                | 0.221 |
| BiP+ERdj3+CH1            | 0.358 |
| BiP+ERdj3+Sil1           | 0.386 |
| BiP+ERdj3+Sil1+CH1       | 0.506 |
| BiP+ERdj3+Sil1+CH1+ IRE1 | 0.348 |

### Supplementary Table 3

Figure 2e-h – Binding affinities for BiP and BiP<sub>V461F</sub> to both folded and misfolded IRE1 LD

|                                                  | $K_d$ ( $\mu$ M)                                        |
|--------------------------------------------------|---------------------------------------------------------|
| BiP <sub>WT</sub> + IRE1                         | $0.54 \pm 0.06$                                         |
| BiP <sub>V461F</sub> + IRE1                      | $0.7 \pm 0.1$                                           |
| BiP <sub>WT</sub> + IRE1 <sub>misfolded</sub>    | $2.9 \pm 0.5$                                           |
| BiP <sub>V461F</sub> + IRE1 <sub>misfolded</sub> | no specific binding as data do not fit saturation curve |

#### Supplementary Table 4

Figure 2j - BiP ATPase activity comparing the effects of folded and misfolded IRE1 (pmol/ $\mu$ l/min)

|                                                |       |
|------------------------------------------------|-------|
| BiP                                            | 0.082 |
| BiP + IRE1                                     | 0.085 |
| BiP + IRE1 <sub>misfolded</sub>                | 0.172 |
| BiP + Sil1 + IRE1                              | 0.080 |
| BiP + Sil1 + IRE1 <sub>misfolded</sub>         | 0.194 |
| BiP + ERdj3 + IRE1                             | 0.091 |
| BiP + ERdj3 + IRE1 <sub>misfolded</sub>        | 0.353 |
| BiP + ERdj3+ Sil1+ IRE1                        | 0.081 |
| BiP + ERdj3 + Sil1+IRE1 <sub>misfolded</sub>   | 0.483 |
| BiP+ERdj3+Sil1+IRE1+ IRE1 <sub>misfolded</sub> | 0.336 |

#### Supplementary Table 5

Figure 3h-k – Binding affinities for GST tagged BiP<sub>WT</sub> and BiP<sub>K294F</sub> to effector proteins

|                              | K <sub>d</sub> ( $\mu$ M)                               |
|------------------------------|---------------------------------------------------------|
| BiP <sub>WT</sub> + IRE1     | 0.66 $\pm$ 0.12                                         |
| BiP <sub>K294F</sub> + IRE1  | no specific binding - data did not fit saturation curve |
| BiP <sub>WT</sub> + PERK     | 2.6 $\pm$ 0.5                                           |
| BiP <sub>K294F</sub> + PERK  | no specific binding - data did not fit saturation curve |
| BiP <sub>WT</sub> + Sil1     | 8.4 $\pm$ 1.6                                           |
| BiP <sub>K294F</sub> + Sil1  | 38 $\pm$ 8.0                                            |
| BiP <sub>WT</sub> + ERdj3    | 8.5 $\pm$ 1.0                                           |
| BiP <sub>K294F</sub> + ERdj3 | 17.8 $\pm$ 4.6                                          |

Supplementary Table 6

Figure 4 – Binding affinities for GST tagged BiP with effector proteins in the presence of ATP and ADP.

|                   | $K_d$ ( $\mu\text{M}$ ) |
|-------------------|-------------------------|
| BiP + IRE1 + ATP  | $1.4 \pm 0.17$          |
| BiP + IRE1 + ADP  | $1.5 \pm 0.2$           |
| BiP + PERK + ATP  | $1.9 \pm 0.3$           |
| BiP + PERK + ADP  | $2.4 \pm 0.4$           |
| BiP + Sil1 + ATP  | $1.6 \pm 0.3$           |
| BiP + Sil1 + ADP  | $1.8 \pm 0.3$           |
| BiP + ERdj3 + ATP | $4.5 \pm 0.9$           |
| BiP + ERdj3 + ADP | $4.1 \pm 0.8$           |

Supplementary Table 7

Figure 5 e-h –  $IC_{50}$  and  $K_i$  values for both low and high concentration phases in the presence and absence of nucleotides.

|         | $IC_{50}$ ( $\mu\text{M}$ ) |                  | $K_i$ ( $\mu\text{M}$ ) |                |
|---------|-----------------------------|------------------|-------------------------|----------------|
|         | Low phase                   | High phase       | Low phase               | High phase     |
| APO     | $3.67 \pm 0.28$             | $121.6 \pm 13.5$ | $0.156 \pm 0.013$       | $5.2 \pm 0.6$  |
| ADP     | $0.064 \pm 0.008$           | $102 \pm 8.9$    | $0.003 \pm 0.0003$      | $4.3 \pm 0.4$  |
| AMP-PNP | $0.57 \pm 0.05$             | $14.7 \pm 1.0$   | $0.02 \pm 0.002$        | $0.6 \pm 0.05$ |
| ATP     | $0.034 \pm 0.004$           | $4.7 \pm 0.15$   | $0.0015 \pm 0.0002$     | $0.2 \pm 0.01$ |
